# Supplementary material for: Carbosilane Dendrimers Loaded with siRNA Targeting Nrf2 as a Tool to Overcome Cisplatin Chemoresistance in Bladder Cancer Cells
Source: PubMed Central journal article supplement (PMC7602517; doi:10.3390/antiox9100993), 2020-10-14
Supplement: antioxidants-09-00993-s001.pdf [file antioxidants-09-00993-s001.pdf]

Ambrosio et al.

## Carbosilane dendrimers loaded with siRNA targeting Nrf2 as a tool to overcome cisplatin chemoresistance in bladder cancer cells.

### SUPPLEMENTARY MATERIALS

#### **Fig 1S.** CDDP-resistance and Nrf2 expression in bladder cancer cells

Both CDDP-resistance and Nrf2 expression was checked in T24 and 253J B-V C-r cells, to confirm our previously reported data (4). As shown in **Fig 1S**, panel A, 2.5  $\mu\text{g/ml}$  CDDP did not affect cell viability (by MTT test) in both T24 and 253J B-V C-r at any time tested, while the inhibition in the sensitive 253J B-V parental clone was statistical significant since 24 h. Higher basal expression of Nrf2 protein in CDDP-resistant cells, with the respect to the sensitive 253J B-V parental clone, was also confirmed (**Fig. 1S**, panel B).

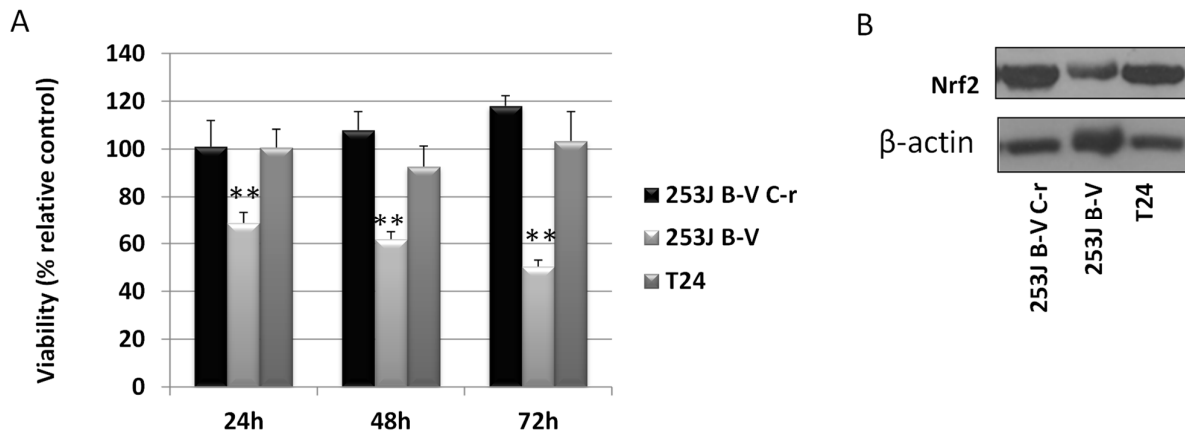

**Fig. 1S** Panel A: MTT assay in T24, 253J B-V C-r, 253J B-V cells treated with 2.5  $\mu\text{g/ml}$  CDDP. Viability was checked at the indicated times. Results are expressed as percent of the relative control values and are the mean  $\pm$  standard deviation of three separate experiments performed in triplicate. \*\* =  $p < 0.01$  versus relative control value. Panel B: Western blot analysis of Nrf2 in T24, 253J B-V C-r, and 253 J B-V. Equal protein loading was confirmed by exposure of the membranes to the anti-GAPDH antibody.

**Fig. 2S.** Nrf2 and Gsta4 inhibition with a lower amount of siNrf2-GCD

T24 and 253J B-V C-r cells were treated with siNrf2-GCD alone (final concentrations 4 µg/ml GCD, 0.04 µM siNrf2) or with naked siNrf2 4 µg/ml transfected the HiPerFect® reagent. Results showed that a lower amount of siNrf2-GCD was able to inhibit Nrf2. Transfection with the HiPerFectR reagent, used as a positive control, showed similar inhibitions.

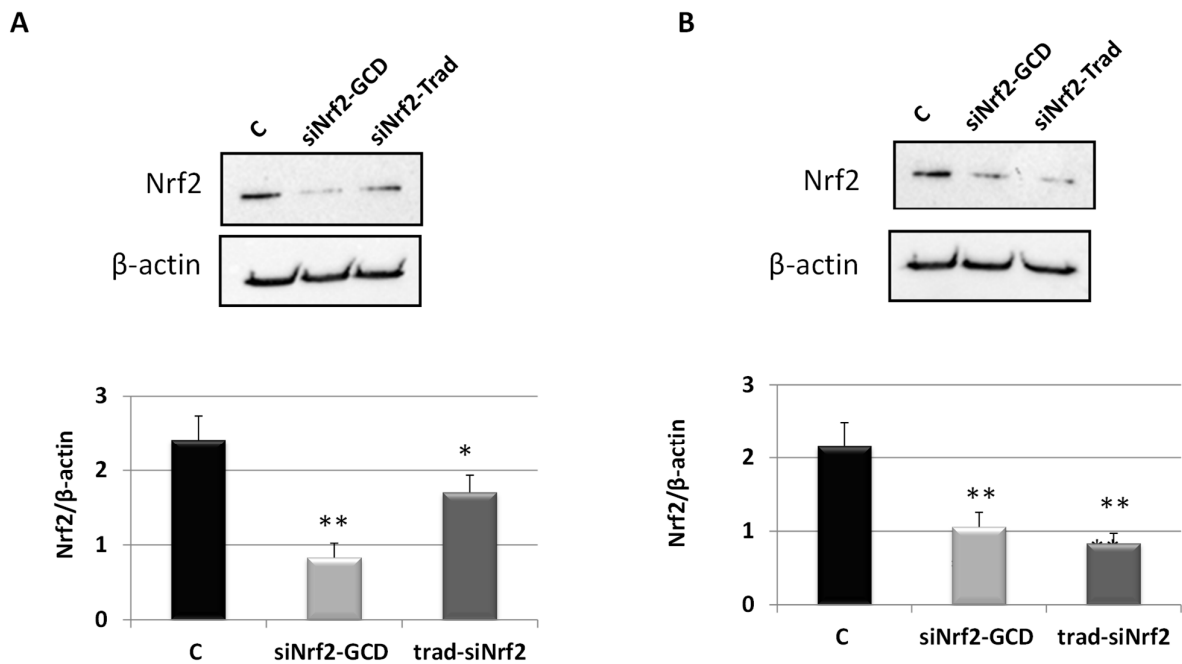

**Fig. 2S** Western blot analysis of Nrf2 in T24 (A) and 253 J B-V C-r CDDP-resistant cells (B), untreated (control, C), treated with siNrf2-GCD (0.04 µM siNrf2 in 4 µg/ml GCD), transfected with the same amount of siNrf2 (0.04 µM) in HiPerFect® reagent with the traditional method (siNrf2-Trad). Cells were collected after 24 h from the treatments. Below, relative densitometric scanning of Nrf2 expression normalized using the β-actin signal. Data are the mean ± SD from three independent experiments. \*\*p<0.01, \*p<0.05 vs. control.
